# Supplementary material
Source: Springer Nature journal article supplement (https://www.springermedizin.de/resource/supplementary/12958_2009_551_MOESM2_ESM.pdf/9568294)
Supplement: MOESM2 [file 9568294]

# L-arginine

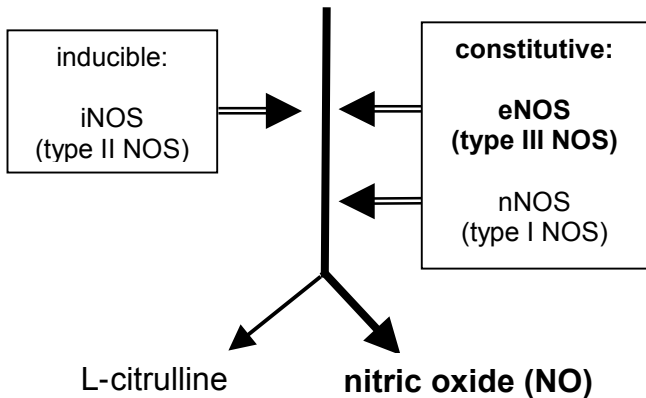

*Low levels constitutive:  
**vasodilation,**  
antiplatelet aggregation  
neurotransmission*

*High levels, inducible:  
cytotoxicity*
